# Supplementary material
Source: PubMed Central journal article supplement (PMC2958048)
Supplement: NIHMS240678-supplement-supplement_1.pdf [file NIHMS240678-supplement-supplement_1.pdf]

## SUPPLEMENTARY ONLINE DATA

# Isolation and characterization of selective and potent human Fab inhibitors directed to the active-site region of the two-component NS2B–NS3 proteinase of West Nile virus

Sergey A. SHIRYAEV\*, Ilian A. RADICHEV\*, Boris I. RATNIKOV\*, Alexander E. ALESHIN\*, Katarzyna GAWLIK\*, Boguslaw STEC\*, Christian FRISCH†, Achim KNAPPIK† and Alex Y. STRONGIN\*<sup>1</sup>

\*Inflammatory and Infectious Disease Center, The Sanford–Burnham Institute for Medical Research, 10901 North Torrey Pines Road, La Jolla, CA 92037, U.S.A., and †AbD Serotec, Lena-Christ-Strasse 48, 82152 Martinsried/Planegg, Germany

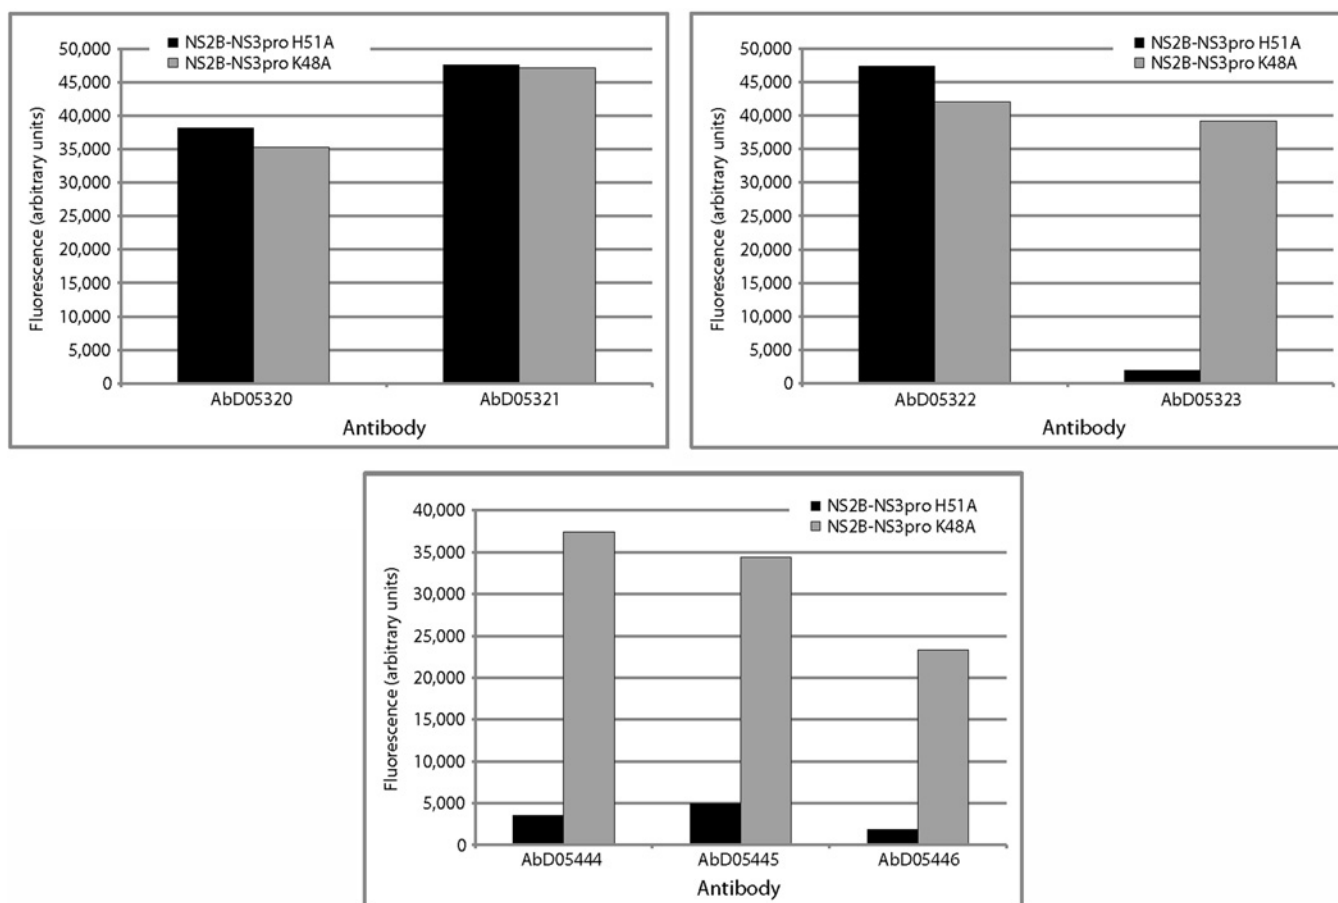

Figure S1 ELISA of the recombinant Fab antibodies with NS2B–NS3pro K48A and NS2B–NS3pro H51A constructs

<sup>1</sup> To whom correspondence should be addressed (email strongin@burnham.org).

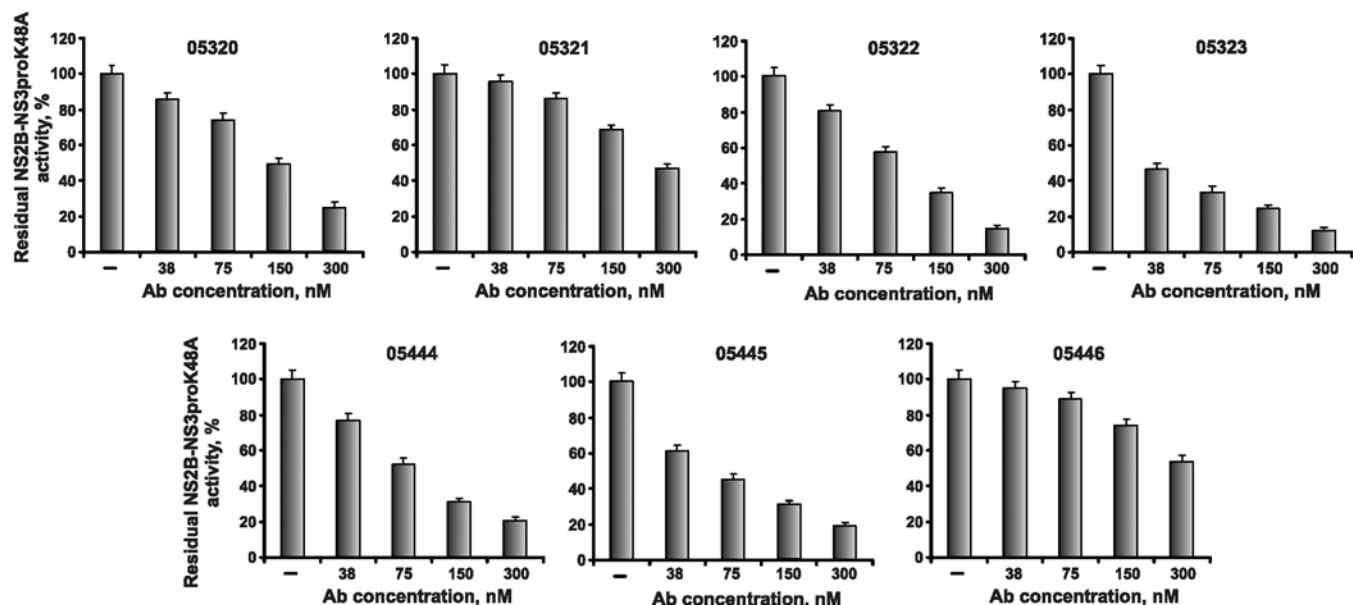

**Figure S2 Selected antibodies efficiently inhibit the catalytic activity of WNV NS2B-NS3pro**

Before the addition of the Pyr-RTKR-AMC substrate (25  $\mu$ M), the purified WNV proteinase (10 nM) was co-incubated for 30 min with increasing concentrations of the antibodies. The residual activity was then monitored continuously at  $\lambda_{\text{ex}} = 360$  nm and  $\lambda_{\text{em}} = 465$  nm to determine the initial velocity of the reactions. The untreated proteinase was used as a control and its activity was counted as 100%. —, no antibody; Ab, antibody.
